# Supplementary material for: Experimental and DFT studies of porous carbon covalently functionalized by polyaniline as a corrosion inhibition barrier on nickel-based alloys in acidic media
Source: Royal Society of Chemistry journal article supplement (doi:10.1039/d0ra00593b), 2020-01-01
Supplement: d0ra00593b1.pdf [file d0ra00593b1.pdf]

## **Experimental and DFT studies of porous carbon covalently functionalized by polyaniline as corrosion inhibition barrier on nickel-based alloys in acidic medium.**

N. Palaniappan,<sup>\*a</sup> I.S. Cole,<sup>\*b</sup> K. Damodaran,<sup>c</sup> A. Kuznetsov,<sup>d</sup> K.R. Justin Thomas,<sup>e</sup> Balasubramanian K<sup>f</sup>

- a. School of chemical sciences Central University of Gujarat-India
- b. Advance Manufacturing and Fabrication Research and Innovation, RMIT University, Melbourne, Victoria 3100, Australia
- c. Chemistry Department Pittsburgh University- US
- d. Organic Materials Laboratory, Department of Chemistry, Indian Institute of Technology Roorkee, Roorkee 247667- India
- e. Department of , Chemistry, Universidad Técnica Federico Santa Maria, Campus Vitacura, Santiago – Chile
- f. Defence Institute of advanced technology, Pune-India

Corresponding author

\* Email: [palaniappancecri@rediffmail.com](mailto:palaniappancecri@rediffmail.com) N.Palaniappan

\* Email: [ivan.cole@rmit.edu.au](mailto:ivan.cole@rmit.edu.au) Prof. Ivan. S.Cole

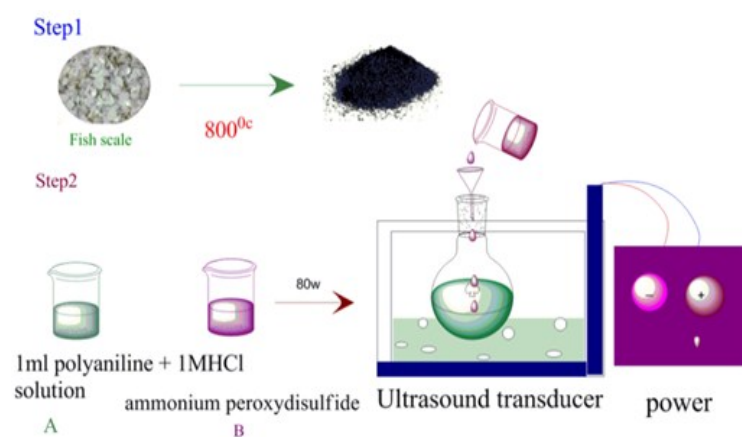

Figure S1. Scheme of the synthetic procedure of polyaniline functionalized fish-scale graphitic carbon

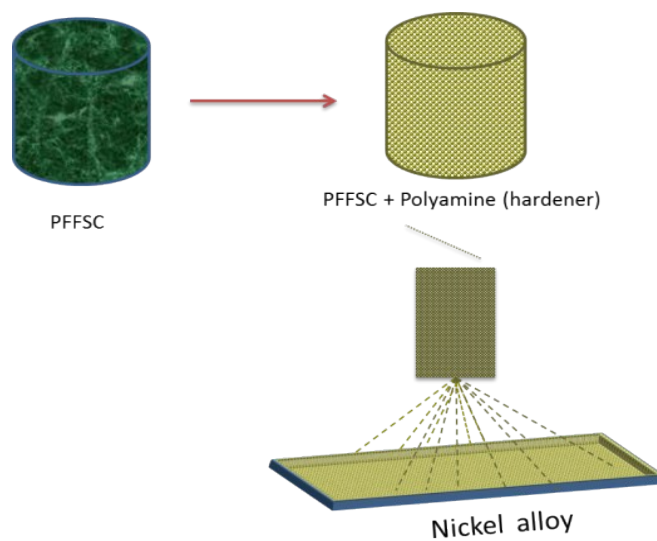

Figure S2. Schematic diagram of nickel alloy coating

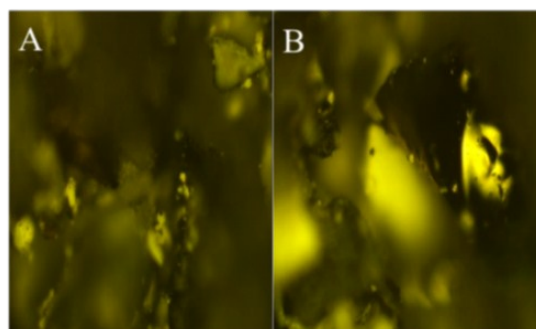

Figure S3. A) Raman image of fish-scale carbon and B) polyaniline functionalized porous carbon

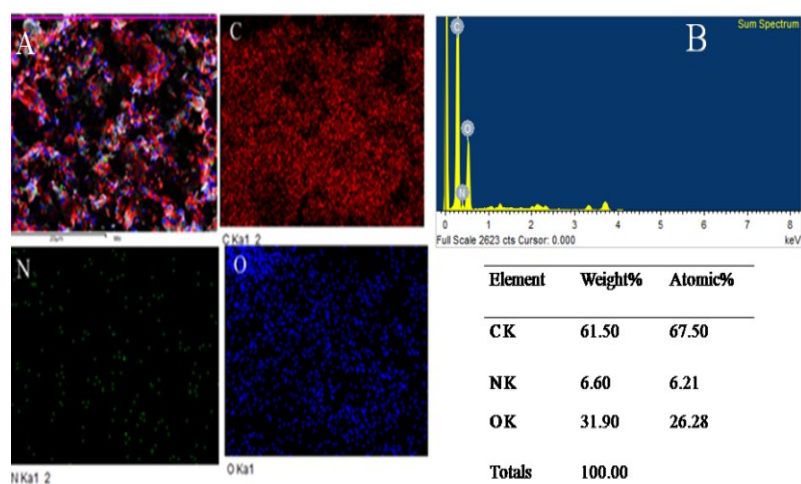

Figure S4. (A) Elemental mapping of polyaniline functionalized fish-scale carbon composite materials and (B) EDX spectrum of polyaniline functionalized fish-scale carbon elements composition

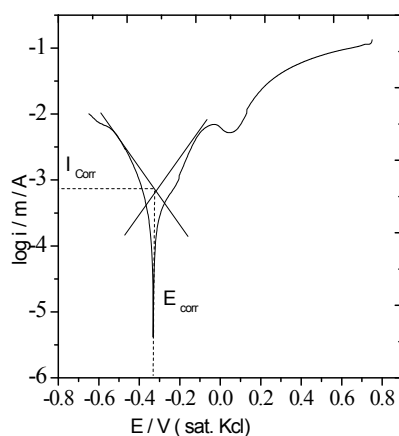

Figure S5. Schematic model of  $I_{corr}$  and  $E_{corr}$  values calculation

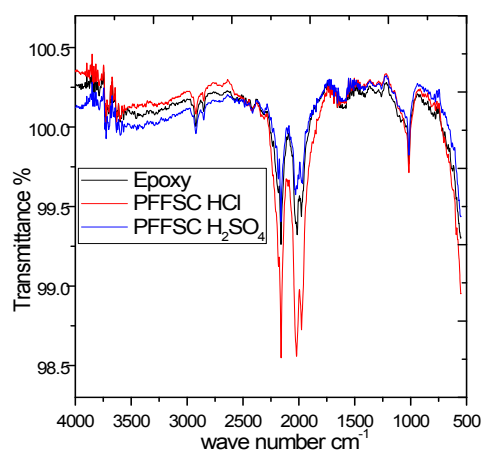

Figure S6. ATR - FTIR studies of epoxy and polyaniline functionalized fish-scale carbon coated nickel alloy immersed for 5 days in 1M HCl and 1M  $H_2SO_4$ .

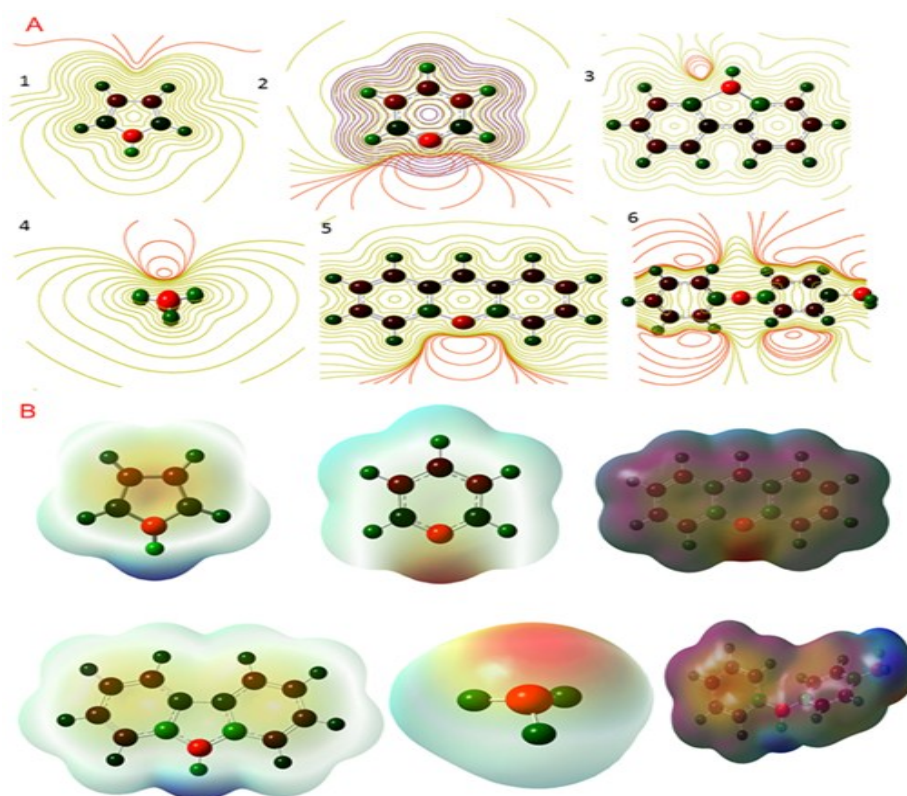

Figure S7. (A) Contour image and (B) total electrostatic potential of polyaniline fragments.

| S.No     | HOMO<br>eV | LUMO<br>eV | $\chi$ eV | $\eta$ eV | $\sigma$ eV | $\omega$ | $\Delta E_j$ | Dm<br>(Debye) |
|----------|------------|------------|-----------|-----------|-------------|----------|--------------|---------------|
| GC       | 4.0463     | 3.0403     | 3.5433    | 0.5030    | 0.9940      | 12.4800  | 0.2575       | 4.7571        |
| 2GC+PANI | 4.9911     | 1.1907     | 3.0909    | 1.9002    | 0.2631      | 3.1760   | 0.4705       | 1.4634        |
| 6GC+PANI | 4.7783     | 1.1265     | 2.9524    | 1.8258    | 0.2738      | 1.2383   | 0.4564       | 2.2169        |

Table S.1 Quantum chemicals values of aniline monomer  $\pi$ -  $\pi$  interacting with fish scale graphitic carbon.
